# Supplementary material for: GO-TiO2 as a Highly Performant Photocatalyst Maximized by Proper Parameters Selection
Source: MDPI journal article supplement (doi:10.3390/ijerph191911874), 2022-09-20
Supplement: s1 [file s1]

## SUPPLEMENTARY MATERIAL

### GO-TiO<sub>2</sub> as a well-performant photocatalyst maximized by proper parameters selection

Aida M. Díez<sup>1,2,\*</sup>, Yury V. Kolen'ko<sup>1</sup>, Marta Pazos<sup>2</sup> and M. Ángeles Sanromán<sup>2</sup>

<sup>1</sup> Nanochemistry research group, International Iberian Nanotechnology Laboratory, Avenida Mestre José Veiga s/n, 4715-330, Braga, Portugal

<sup>2</sup> CINTECX, Universidade de Vigo, Grupo de Bioingeniería y Procesos Sostenibles, Departamento de Ingeniería Química, Campus Lagoas-Marcosende, 36310 Vigo, Spain.

\*adiez@uvigo.es

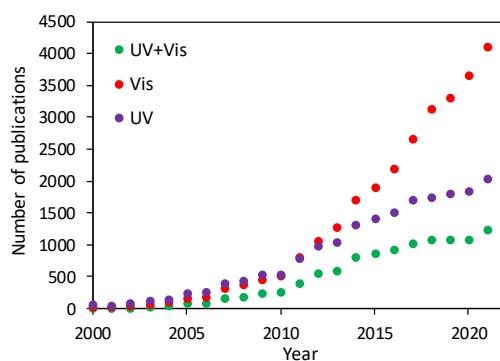

Figure S1-SM. Number of publications indexed on Scopus by searching for photocatalysis+ UV, photocatalysis + Visible or photocatalysis+ Visible and UV.

Table S1-SM. Characteristics of the real working matrixes on the study.

| Parameter (units)                             | Physical treated water | Physical+biological treated water |
|-----------------------------------------------|------------------------|-----------------------------------|
| pH                                            | 7.5                    | 7.2                               |
| Conductivity (mS/cm)                          | 1.135                  | 1.006                             |
| Chemical Oxygen Demand (mg O <sub>2</sub> /L) | 247                    | 46                                |
| Suspended solids (mg/L)                       | 66                     | 19                                |

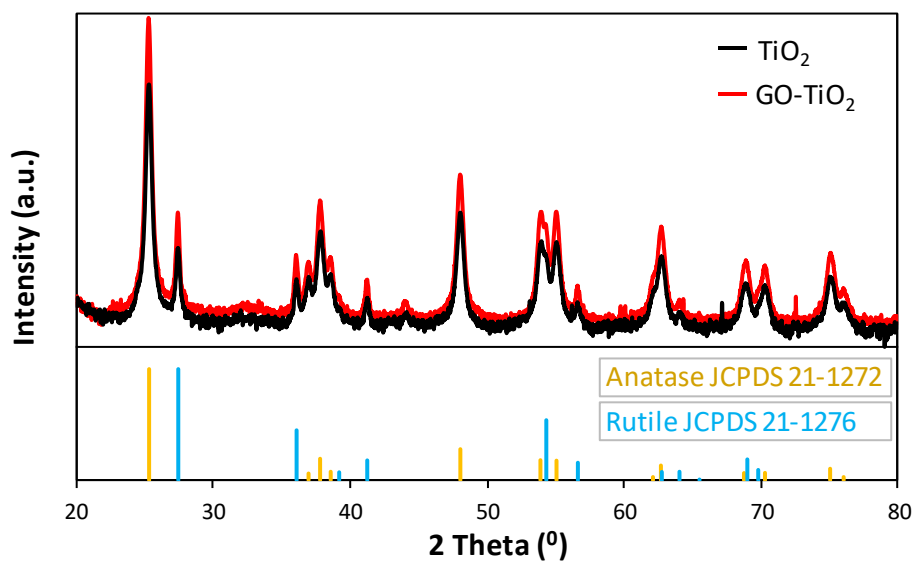

Figure S2-SM. XRD spectra of  $\text{TiO}_2$  (black) and  $\text{GO-TiO}_2$  (red) catalysts.

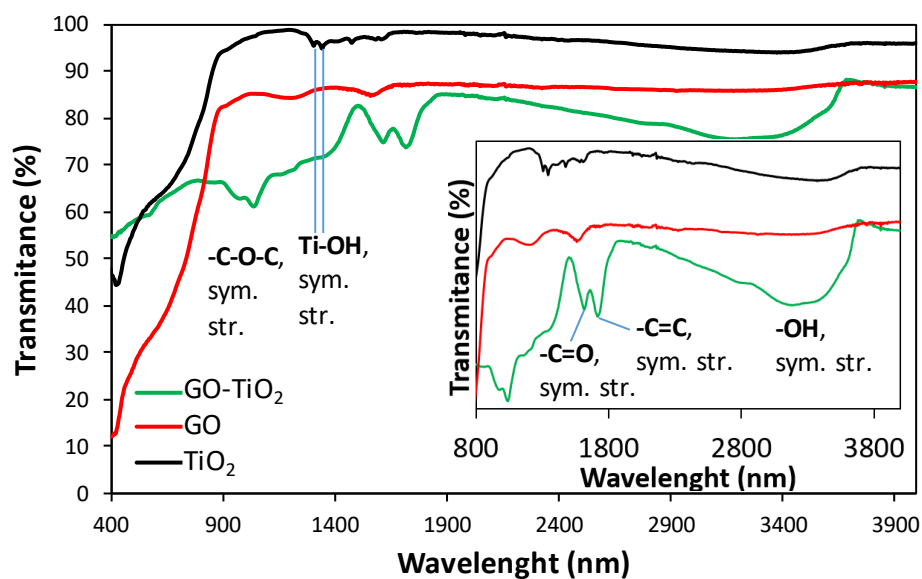

Figure S3-SM. FTIR spectra of  $\text{TiO}_2$  (black), GO (green) and  $\text{GO-TiO}_2$  (red) compounds. The insert figure is the zoom in of the spectra between 800 and 3700 nm. Sym. str.=symmetric stretching.

Table S2-SM. Porous characteristics of  $\text{TiO}_2$  and  $\text{GO-TiO}_2$ .

| Photocatalyst     | Surface area ( $\text{m}^2/\text{g}$ ) | Pore volume ( $\text{cm}^3/\text{g}$ ) | Pore diameter (nm) |
|-------------------|----------------------------------------|----------------------------------------|--------------------|
| $\text{TiO}_2$    | 61.265                                 | 0.519                                  | 34.3               |
| $\text{GO-TiO}_2$ | 73.197                                 | 0.742                                  | 39.9               |

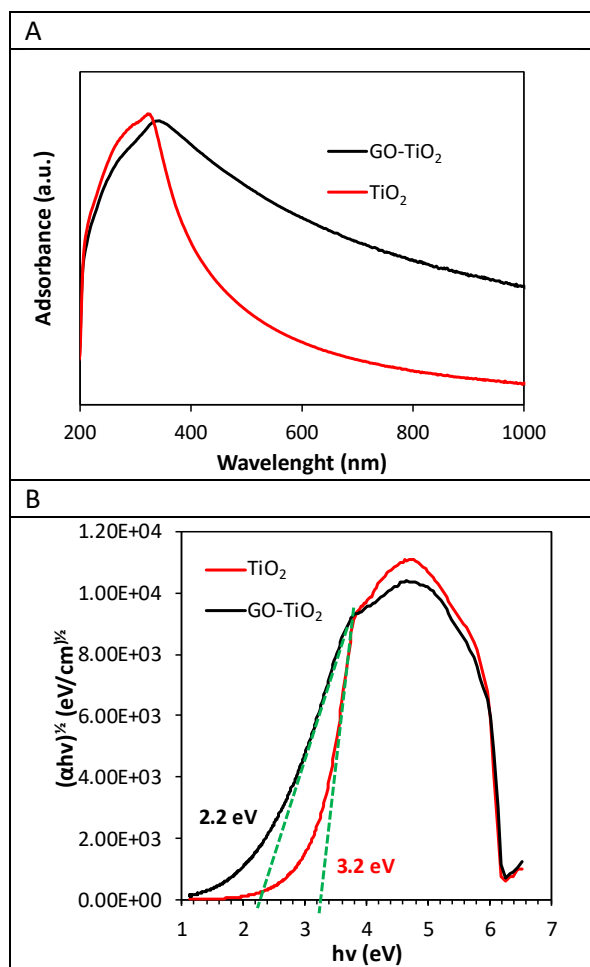

Figure S4-SM. A: UV-Vis spectra of  $\text{TiO}_2$  and  $\text{GO-TiO}_2$ . B. Tauc plots of both  $\text{TiO}_2$  and  $\text{GO-TiO}_2$  photocatalysts.

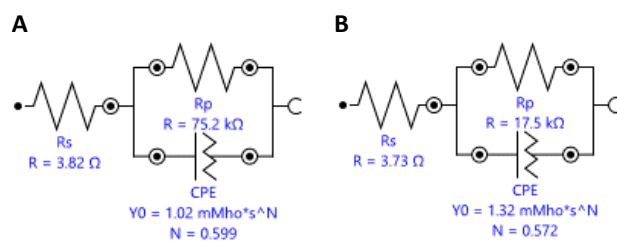

Figure S5-SM. Fitted reactors to the Nyquist results for  $\text{TiO}_2$  (a) and  $\text{GO-TiO}_2$  (B) catalysts.
